# Supplementary material for: Temporal analysis of melanogenesis identifies fatty acid metabolism as key skin pigment regulator
Source: PLoS Biol. 2022 May 18;20(5):e3001634. doi: 10.1371/journal.pbio.3001634 (PMC9116682; doi:10.1371/journal.pbio.3001634)
Supplement: S1 Data — (XLSX) [file pbio.3001634.s010.xlsx]

## Sheet: Figure 1
Figure 1 Data quantitation
Panel A									ANOVA summary
Melanin estimation	R1	R2	R3	Mean	SD	SE			F	18.28		Tukey's multiple comparisons test	Mean Diff.	95.00% CI of diff.	Significant?	Summary
D3	120.742	112	122.59	118.352	5.65664	3.26587			P value	0.0006
D4	135.943	115.215	140.24	129.991	13.3814	7.72573			P value summary	***		D3 vs. D4	-12.02	-38.33 to 14.29	No	ns
D5	156.135	150.828	149.162	152.013	3.64149	2.10241			Significant diff. among means (P < 0.05)?	Yes		D3 vs. D5	-33.6	-59.91 to -7.290	Yes	*
D6	161.619	188.484	174.321	174.464	13.4391	7.75908			R square	0.8727		D3 vs. D6	-56.36	-82.67 to -30.06	Yes	***
									F (DFn, DFd)	F (3, 8) = 18.28
Panel C
Western Blot									ANOVA summary
MITF									F	59.24
D3	1	1	1	1	0	0			P value	<0.0001		Dunnett's multiple comparisons test	Mean Diff.	95.00% CI of diff.	Significant?	Summary	Adjusted P Value
D4	0.481031	0.583028	0.582662	0.546714	0.0587825	0.0339381			P value summary	****		D3 vs. D4	0.4511	0.2421 to 0.6600	Yes	***	0.0007
D5	0.199877	0.530915	0.321743	0.324413	0.167427	0.0966639			Significant diff. among means (P < 0.05)?	Yes		D3 vs. D5	0.6492	0.4402 to 0.8581	Yes	****	<0.0001
D6	0.05	0.06	0.07	0.0594392	0.01	0.0057735			R square	0.9569		D3 vs. D6	0.94	0.7311 to 1.149	Yes	****	<0.0001
									F (DFn, DFd)	F (3, 8) = 59.24
									ANOVA summary
PMEL									F	55.43
D3	1	1	1	1	0	0			P value	<0.0001		Dunnett's multiple comparisons test	Mean Diff.	95.00% CI of diff.	Significant?	Summary	Adjusted P Value
D4	2.11621	2.23281	2.46408	2.2665	0.177056	0.102223			P value summary	****		D3 vs. D4	-1.271	-1.611 to -0.9308	Yes	****	<0.0001
D5	1.88956	2.18635	1.98152	2.01539	0.151927	0.0877152			Significant diff. among means (P < 0.05)?	Yes		D3 vs. D5	-1.019	-1.359 to -0.6789	Yes	****	<0.0001
D6	1.08393	1.37795	1.07861	1.17229	0.171311	0.0989065			R square	0.9541		D3 vs. D6	-0.1802	-0.5204 to 0.1601	No	ns	0.3515
									F (DFn, DFd)	F (3, 8) = 55.43
									ANOVA summary
TYR									F	15.14
D3	1	1	1	1	0	0			P value	0.0012		Dunnett's multiple comparisons test	Mean Diff.	95.00% CI of diff.	Significant?	Summary	Adjusted P Value
D4	12.7234	9.16617	5.46568	8.60621	3.6291	2.09526			P value summary	**		D3 vs. D4	-8.118	-19.09 to 2.858	No	ns	0.1516
D5	29.3653	21.5381	18.2044	22.5808	5.72923	3.30777			Significant diff. among means (P < 0.05)?	Yes		D3 vs. D5	-22.04	-33.01 to -11.06	Yes	**	0.0011
D6	27.2782	22.5771	14.5866	20.788	6.41649	3.70456			R square	0.8503		D3 vs. D6	-20.48	-31.46 to -9.504	Yes	**	0.0017
									F (DFn, DFd)	F (3, 8) = 15.14
Panel G
Vol of lipid droplets/cell	D4			D5			D6				ANOVA summary
	R1	R2	R3	R1	R2	R3	R1	R2	R3		F	11.97
Cell1	0.111	0.1092	0	0.25148	0	5.1118	0.194	3.08061	0.8502		P value	<0.0001
Cell2	0	0.187	0	0.4877	10.9512	3.4358	0.324	4.2763	1.9725		P value summary	****
Cell3	0	0.0702	0	0.82713	0.8114	1.2826	0.0877	0	0.218		Significant diff. among means (P < 0.05)?	Yes
Cell4	0	1.033	0	0	36.5407	0.7297	0.05341	0	0.1794		R square	0.3152
Cell5	0	0.261	0	1.406	15.2395	0.5728	0.149	0.126	2.1647		F (DFn, DFd)	F (2, 52) = 11.97
Cell6	0	0.5267	0	3.07991	25.6015	2.6832	0.0648	2.4385	0.1953
Cell7	0.386	0.228	0	0.4991	3.60331	2.2867	0.2631	1.231	0.156
Cell8	0.3865	0	0	1.21972	0.9302	0.4289	0.294	0.47632	0.561		Tukey's multiple comparisons test	Mean Diff.	95.00% CI of diff.	Significant?	Summary	Adjusted P Value
Cell9	0.2941	0	0	4.12494	0	2.7301	0.0457	4.04073	0		D4 vs. D5	-3.795	-5.852 to -1.737	Yes	***	0.0001
Cell10	0	0	0	3.2782	5.5376	2.5938	0.118	0.65162	0		D4 vs. D6	-1.411	-3.468 to 0.6465	No	ns	0.2325
Cell11	0	0	0	2.7029	18.7207	3.237	0.0572	0.7314	0		D5 vs. D6	2.384	0.7042 to 4.064	Yes	**	0.0034
Cell12	0	0	0	0	7.75047	4.3663	0.3088	0.248	0
Cell13	0	0	0	1.59047	7.8953	6.2068	0.55651	4.87271	0.9865
Cell14	1.09402	0	0	0.118	1.8916	0.562	0.2749	0.34334	0.0741
Cell15	0.3064	0	0	0.1296	0	10.976	0.8533	7.54893	6.954
Cell16	0.0994	0	0	0.3545	0.2788	22.2352	0	1.31141	1.9268
Cell17	0.1721	0	0	0.0762	0	5.8416	0	0	3.7984
Cell18	1.859	0	0	0.2325	0	9.8906	0.47732	0	1.8098
Cell19	0	0	0	1.3238	0	19.0803	0.0839	3.39627	2.4804
Cell20	0	0	0	0.0953	0	0	4.49786	2.3645	0
Cell21	0.0994			0.2516	0	0	0.7672	3.00294	0
Cell22	0.065			0.9877	0	0	1.262	4.6499	0
Cell23	0			0	1.1018	0	4.05623	9.6694	0
Cell24	0			0	0.29322	0	3.1379	0	0
Cell25	0			3.37428	0.32741	0	0.2744	0	0
Cell26	0			0.2899	0.126
Cell27	0			1.71606	1.659
Cell28	0			0.0839	0
Cell29	0			0.3129	0.0572
Cell30	0			0	0
	R1		R2		R3
Volume of lipid droplet/cell	No of cells	Mean Vol	No of cells	Mean Vol	No of cells	Mean Vol	SD	SE
D4	30	0.257881	20	0.240408	20	0	0.293778	0.0351132
D5	30	0.768638	30	1.38082	25	3.11166	6.27891	0.681044
D6	25	0.309131	25	0.807575	25	1.5394	1.97444	0.227989
Panel H
Volume spread of lipid droplets	D4			D5			D6				ANOVA summary
	R1	R2	R3	R1	R2	R3	R1	R2	R3		F	3.94
	0.39	0.308		2.5	2.18	2.76	0.253	0.519	0.979		P value	0.0206
	0.378	0.125		2.07	1.89	2.04	0.234	0.429	0.675		P value summary	*
	0.261	0.121		1.14	1.44	1.47	0.199	0.335	0.647		Significant diff. among means (P < 0.05)?	Yes
	0.195	0.101		0.975	0.916	0.959	0.191	0.308	0.628		R square	0.0292
	0.152	0.0819		0.784	0.893	0.737	0.179	0.253	0.616		F (DFn, DFd)	F (2, 262) = 3.940
	0.129	0.0741		0.694	0.819	0.702	0.164	0.238	0.593
	0.125	0.0585		0.675	0.756	0.667	0.156	0.226	0.589
	0.109	0.0507		0.507	0.682	0.651	0.156	0.203	0.589		Tukey's multiple comparisons test	Mean Diff.	95.00% CI of diff.	Significant?	Summary	Adjusted P Value
	0.101	0.0507		0.503	0.589	0.612	0.152	0.156	0.554		D4 vs. D5	-0.1269	-0.2492 to -0.004670	Yes	*	0.0398
	0.0936	0.0429		0.48	0.569	0.601	0.129	0.129	0.554		D4 vs. D6	-0.05953	-0.1967 to 0.07767	No	ns	0.5632
	0.0771	0.039		0.472	0.534	0.577	0.117	0.125	0.554		D5 vs. D6	0.06741	-0.02097 to 0.1558	No	ns	0.1723
	0.0663	0.0039		0.468	0.499	0.573	0.113	0.0897	0.542
	0.0637	0.0039		0.464	0.476	0.569	0.109	0.0468	0.425
	0.057			0.433	0.476	0.565	0.109	0.0156	0.37
	0.039			0.433	0.456	0.538	0.105	0.0039	0.355
	0.0351			0.429	0.448	0.534	0.0936		0.312
	0.0312			0.402	0.441	0.519	0.0897		0.304
	0.0201			0.39	0.433	0.507	0.0897		0.289
	0.0195			0.382	0.429	0.507	0.078		0.265
	0.0156			0.378	0.413	0.499	0.0702		0.253
	0.0156			0.363	0.394	0.48	0.0663		0.25
	0.0117			0.359	0.394	0.472	0.0585		0.234
	0.0101			0.351	0.39	0.437	0.0585		0.23
	0.0078			0.351	0.386	0.433	0.0546		0.191
	0.0039			0.343	0.386	0.425	0.0312		0.187
	0.0039			0.339	0.382	0.413	0.0234		0.187
	0.0039			0.331	0.382	0.409	0.0195		0.183
				0.328	0.378	0.406	0.0195		0.168
				0.32	0.367	0.406	0.0156		0.16
				0.316	0.335	0.394	0.0117		0.136
				0.312	0.328	0.386	0.0117		0.133
				0.312	0.308	0.382	0.0117		0.133
				0.304	0.308	0.374	0.0117		0.133
				0.3	0.3	0.37	0.0117		0.125
				0.281	0.292	0.37	0.0078		0.109
				0.273	0.285	0.37	0.0039		0.0975
				0.261	0.281	0.367	0.0039		0.0819
				0.253	0.269	0.367	0.0039		0.0702
				0.253	0.265	0.359	0.0039		0.0663
				0.23	0.261	0.355	0.0039		0.0585
				0.23	0.25	0.347			0.0546
				0.226	0.246	0.328			0.0546
				0.226	0.246	0.324			0.0429
				0.222	0.242	0.32			0.0351
				0.222	0.23	0.316			0.0351
				0.214	0.23	0.316			0.0273
				0.214	0.226	0.316			0.0234
				0.203	0.218	0.316			0.0234
				0.199	0.214	0.316			0.0234
				0.195	0.211	0.316			0.0195
				0.179	0.207	0.312			0.0156
				0.179	0.207	0.292			0.0156
				0.16	0.203	0.292			0.0117
				0.152	0.199	0.285			0.0117
				0.144	0.199	0.281			0.0078
				0.136	0.195	0.273			0.0078
				0.133	0.191	0.273			0.0078
				0.133	0.183	0.273			0.0039
				0.125	0.183	0.273			0.0039
				0.117	0.183	0.269			0.0039
				0.113	0.183	0.265
				0.113	0.179	0.265
				0.113	0.175	0.265
				0.109	0.175	0.253
				0.109	0.172	0.253
				0.105	0.168	0.253
				0.0975	0.168	0.25
				0.0975	0.168	0.238
				0.0936	0.164	0.234
				0.0936	0.16	0.23
				0.0897	0.152	0.23
				0.0897	0.152	0.214
				0.0819	0.152	0.211
				0.078	0.14	0.211
				0.078	0.14	0.207
				0.078	0.133	0.207
				0.0741	0.133	0.203
				0.0741	0.133	0.195
				0.0702	0.129	0.187
				0.0663	0.129	0.187
				0.0663	0.129	0.175
				0.0624	0.125	0.172
				0.0624	0.121	0.172
				0.0624	0.121	0.172
				0.0546	0.113	0.172
				0.0507	0.113	0.168
				0.0507	0.109	0.168
				0.0429	0.105	0.164
				0.0429	0.105	0.16
				0.0312	0.105	0.16
				0.0312	0.105	0.16
				0.0273	0.101	0.156
				0.0273	0.101	0.156
				0.0273	0.101	0.156
				0.0273	0.0975	0.152
				0.0234	0.0975	0.148
				0.0234	0.0897	0.144
				0.0234	0.0897	0.144
				0.0195	0.0858	0.14
				0.0195	0.0858	0.14
				0.0195	0.0858	0.14
				0.0195	0.0819	0.14
				0.0156	0.0819	0.136
				0.0156	0.0819	0.133
				0.0156	0.0819	0.129
				0.0156	0.0741	0.129
				0.0156	0.0741	0.125
				0.0156	0.0741	0.125
				0.0156	0.0702	0.125
				0.0156	0.0702	0.125
				0.0117	0.0702	0.125
				0.0117	0.0702	0.121
				0.0117	0.0702	0.121
				0.0117	0.0663	0.117
				0.0117	0.0663	0.117
				0.0117	0.0663	0.117
				0.0117	0.0663	0.113
				0.0117	0.0624	0.109
				0.0117	0.0624	0.105
				0.0117	0.0624	0.0936
				0.0117	0.0624	0.0897
				0.0117	0.0624	0.0897
				0.0078	0.0585	0.0858
				0.0078	0.0546	0.0819
				0.0078	0.0546	0.078
				0.0078	0.0546	0.078
				0.0078	0.0507	0.078
				0.0078	0.0468	0.078
				0.0078	0.0429	0.078
				0.0078	0.0429	0.078
				0.0078	0.039	0.0741
				0.0078	0.039	0.0663
				0.0078	0.0351	0.0663
				0.0078	0.0351	0.0624
				0.0078	0.0351	0.0624
				0.0078	0.0234	0.0585
				0.0039	0.0234	0.0585
				0.0039	0.0195	0.0546
				0.0039	0.0195	0.0546
				0.0039	0.0195	0.0546
				0.0039	0.0195	0.0507
				0.0039	0.0195	0.0507
				0.0039	0.0156	0.0468
				0.0039	0.0156	0.0468
				0.0039	0.0156	0.0468
				0.0039	0.0156	0.0468
				0.0039	0.0156	0.0429
				0.0039	0.0117	0.039
				0.0039	0.0117	0.039
				0.0039	0.0117	0.0351
				0.0039	0.0078	0.0351
				0.0039	0.0078	0.0312
				0.0039	0.0078	0.0273
					0.0078	0.0234
					0.0078	0.0234
					0.0078	0.0195
					0.0039	0.0195
					0.0039	0.0195
					0.0039	0.0195
					0.0039	0.0156
					0.0039	0.0156
					0.0039	0.0156
					0.0039	0.0156
					0.0039	0.0156
					0.0039	0.0156
					0.0039	0.0156
					0.0039	0.0156
					0.0039	0.0117
					0.0039	0.0117
						0.0117
						0.0078
						0.0078
						0.0078
						0.0078
						0.0078
						0.0078
						0.0078
						0.0078

## Sheet: Figure 3
Panel C	D5						D6							ANOVA table	SS	DF	MS	F (DFn, DFd)	P value		Dunnett's multiple comparisons test	Mean Diff.	95.00% CI of diff.	Significant?	Summary	Adjusted P Value
C-13 Glucose incorporation	R1	R2	R3	Mean	SD	SE	R1	R2	R3	Mean	SD	SE		Interaction	11.27	18	0.6261	F (18, 40) = 5.980	P<0.0001
GLUCOSE	1.21223	1.13916	1	1.11713	0.107816	0.0622477	0.903829	0.280943	0.264797	0.48319	0.364374	0.210371		Row Factor	22.21	9	2.468	F (9, 20) = 17.07	P<0.0001		GLUCOSE
GLUCOSE-6-PHOSPHATE	1.29689	0.636731	1	0.977873	0.330634	0.190892	0.738436	0.650858	-0.13166	0.419211	0.479074	0.276594		Time	7.107	2	3.553	F (1.667, 33.33) = 33.94	P<0.0001		D0 vs. D5	-1.151	-1.451 to -0.8506	Yes	**	0.0036
FRUCTOSE-6-PHOSPHATE	1.46736	1.13026	1	1.19921	0.241186	0.139249	0.679173	0.155609	-0.18442	0.216787	0.435035	0.251167		Subject	2.892	20	0.1446	F (20, 40) = 1.381	P=0.1886		D0 vs. D6	-0.5167	-1.439 to 0.4054	No	ns	0.1426
FRUCTOSE-1,6-BISPHOSPHATE	1.85605	0.861586	1	1.23921	0.538661	0.310996	0.732006	-0.09487	-0.05455	0.194195	0.466194	0.269157		Residual	4.188	40	0.1047
3-PHOSPHOGLYCERATE	0.585727	0.569896	0.5	0.551874	0.0456165	0.0263367	0.246076	0.141938	-0.09757	0.0968147	0.176211	0.101735									GLUCOSE-6-PHOSPHATE
PHOSPHOENOL PYRUVATE	1.68583	0.471092	1	1.05231	0.609057	0.351639	0.75154	0.051392	-0.1606	0.214111	0.477345	0.275595									D0 vs. D5	-0.9953	-1.844 to -0.1462	Yes	*	0.0369
LACTATE	1.88405	2.26074	1	1.71493	0.647161	0.373638	2.00128	0.033911	1.57462	1.20327	1.03492	0.597511									D0 vs. D6	-0.4366	-1.733 to 0.8598	No	ns	0.3116
CITRATE	-0.70235	-0.74194	-0.72214	-0.722143	0.019795	0.0114286	-0.91176	-0.86734	-0.78955	-0.856217	0.0618597	0.0357147
SUCCINATE	-0.5059	-0.61233	-0.55912	-0.559117	0.053215	0.0307237	-0.84314	-0.73485	-0.789	-0.788997	0.054145	0.0312606									FRUCTOSE-6-PHOSPHATE
MALATE	-0.34321	-0.83828	-0.59075	-0.590747	0.247535	0.142914	-0.8544	-0.84686	-0.75063	-0.817297	0.057858	0.0334043									D0 vs. D5	-1.195	-2.093 to -0.2960	Yes	*	0.029
																					D0 vs. D6	-0.2122	-1.718 to 1.293	No	ns	0.7107
																					FRUCTOSE-1,6-BISPHOSPHATE
																					D0 vs. D5	-1.233	-2.920 to 0.4536	No	ns	0.0894
																					D0 vs. D6	-0.188	-1.645 to 1.269	No	ns	0.7445
																					3-PHOSPHOGLYCERATE
																					D0 vs. D5	-0.5609	-0.7484 to -0.3735	Yes	**	0.0059
																					D0 vs. D6	-0.1059	-0.4038 to 0.1920	No	ns	0.2894
																					PHOSPHOENOL PYRUVATE
																					D0 vs. D5	-1.008	-3.085 to 1.070	No	ns	0.1811
																					D0 vs. D6	-0.1694	-1.692 to 1.354	No	ns	0.7956
																					LACTATE
																					D0 vs. D5	-1.748	-3.755 to 0.2585	No	ns	0.0648
																					D0 vs. D6	-1.237	-4.253 to 1.780	No	ns	0.2354
																					CITRATE
																					D0 vs. D5	0.6316	0.1938 to 1.069	Yes	*	0.0247
																					D0 vs. D6	0.7657	0.2653 to 1.266	Yes	*	0.022
																					SUCCINATE
																					D0 vs. D5	0.4837	0.2017 to 0.7657	Yes	*	0.0176
																					D0 vs. D6	0.7136	0.09798 to 1.329	Yes	*	0.0377
																					MALATE
																					D0 vs. D5	0.5201	0.1576 to 0.8826	Yes	*	0.025
																					D0 vs. D6	0.7466	0.2995 to 1.194	Yes	*	0.0186
Panel E	D5						D6
C-13 Palmitate incorporation	R1	R2	R3	Mean	SD	SE	R1	R2	R3	Mean	SD	SE		ANOVA table	SS	DF	MS	F (DFn, DFd)	P value		Dunnett's multiple comparisons test	Mean Diff.	95.00% CI of diff.	Significant?	Summary	Adjusted P Value
CITRATE	-0.14419	2.25581	2.90698	1.67287	1.60695	0.927771	-0.05116	0.432558	0.190698	0.190699	0.241859	0.139637		Interaction	6.92	4	1.73	F (4, 12) = 1.424	P=0.2850
SUCCINATE	2.55223	4.58742	4.70273	3.94746	1.20968	0.69841	0.912392	0.69225	0.708723	0.771122	0.122621	0.0707951		Row Factor	7.662	2	3.831	F (2, 6) = 1.951	P=0.2224		CITRATE
MALATE	0.705263	5.56842	5.96842	4.0807	2.93005	1.69166	1.08421	1.82105	2.24211	1.71579	0.58608	0.338374		Time	48.37	2	24.18	F (2, 12) = 19.91	P=0.0002		D0 vs. D5	-1.507	to	Yes	***	0.0001
														Subject	11.78	6	1.963	F (6, 12) = 1.616	P=0.2254		D0 vs. D6	-0.02481	to	Yes	***	0.0001
														Residual	14.58	12	1.215
																					SUCCINATE
																					D0 vs. D5	-3.919	to	Yes	***	0.0001
																					D0 vs. D6	-0.7423	to	Yes	***	0.0001
																					MALATE
																					D0 vs. D5	-4.049	to	Yes	***	0.0001
																					D0 vs. D6	-1.684	to	Yes	***	0.0001

## Sheet: Figure 4
Figure 4 Data Quantitation
Panel A		GLUCOSE D5						OLEATE D5									Sidak's multiple comparisons test	Mean Diff.	95.00% CI of diff.	Significant?	Summary	Adjusted P Value
OCR	TIME	R1	R2	Mean	SD	SE	R1	R2	Mean	SD	SE		ANOVA table	F (DFn, DFd)	P value
	1.4	120.8	229.9	166.649	77.1453	54.55	189	337.9	252.711	105.288	74.45		Interaction	F (11, 12) = 24.13	P<0.0001		D5 glucose - D5 Oleate
	9.9	116.6	209.8	156.405	65.9024	46.6	187.8	315.4	243.376	90.2268	63.8		Row Factor	F (11, 12) = 9.379	P=0.0003		1.4	-88.1	-137.8 to -38.40	Yes	***	0.0005
	18.5	114.6	208.8	154.688	66.6095	47.1	188.5	322.2	246.444	94.5402	66.85		Column Factor	F (1, 12) = 272.8	P<0.0001		9.9	-88.4	-138.1 to -38.70	Yes	***	0.0005
	27.1	81.4	90.6	85.8769	6.50538	4.6	78.5	99	88.1561	14.4957	10.25		Subject	F (12, 12) = 24.54	P<0.0001		18.5	-93.65	-143.4 to -43.95	Yes	***	0.0003
	35.7	76.6	95	85.3053	13.0108	9.2	74	105.5	88.3572	22.2739	15.75						27.1	-2.75	-52.45 to 46.95	No	ns	>0.9999
	44.2	75.6	93.4	84.03	12.5865	8.9	72	107	87.7724	24.7487	17.5						35.7	-3.95	-53.65 to 45.75	No	ns	>0.9999
	52.9	185.1	260	219.376	52.9623	37.45	341.1	414.5	376.013	51.9016	36.7						44.2	-5	-54.70 to 44.70	No	ns	>0.9999
	61.4	177.1	272.3	219.6	67.3166	47.6	366.5	413.9	389.48	33.5169	23.7						52.9	-155.3	-205.0 to -105.5	Yes	****	<0.0001
	70	167.7	256.2	207.279	62.579	44.25	368.9	409.6	388.718	28.7792	20.35						61.4	-165.5	-215.2 to -115.8	Yes	****	<0.0001
	78.6	45.7	30.6	37.3955	10.6773	7.55	52.2	36.5	43.6497	11.1016	7.85						70	-177.3	-227.0 to -127.6	Yes	****	<0.0001
	87.2	45.3	31.6	37.8349	9.68736	6.85	59.5	39.4	48.418	14.2128	10.05						78.6	-6.2	-55.90 to 43.50	No	ns	>0.9999
	95.7	42.2	29.9	35.5215	8.69741	6.15	58.1	37.9	46.9254	14.2836	10.1						87.2	-11	-60.70 to 38.70	No	ns	0.9993
																	95.7	-11.95	-61.65 to 37.75	No	ns	0.9984
OCR		GLUCOSE D6						OLEATE D6									Sidak's multiple comparisons test	Mean Diff.	95.00% CI of diff.	Significant?	Summary	Adjusted P Value
	TIME	R1	R2	Mean	SD	SE	R1	R2	Mean	SD	SE
	1.4	30.8	65	44.7437	24.1831	17.1	47.2	80.3	61.5643	23.4052	16.55		ANOVA table	F (DFn, DFd)	P value		D6 glucose - D6 Oleate
	9.9	30	60.7	42.6732	21.7082	15.35	50	78.6	62.6897	20.2233	14.3		Interaction	F (11, 12) = 2.391	P=0.0748		1.4	-15.85	-60.90 to 29.20	No	ns	0.9628
	18.5	35.4	59.3	45.8172	16.8999	11.95	50.4	78.8	63.02	20.0818	14.2		Row Factor	F (11, 12) = 7.779	P=0.0007		9.9	-18.95	-64.00 to 26.10	No	ns	0.8853
	27.1	44.4	41.5	42.9255	2.05061	1.45	46.8	34.6	40.2403	8.6267	6.1		Column Factor	F (1, 12) = 31.67	P=0.0001		18.5	-17.25	-62.30 to 27.80	No	ns	0.9346
	35.7	41.1	38.9	39.9849	1.55563	1.1	47.9	31.7	38.967	11.4551	8.1		Subject	F (12, 12) = 3.214	P=0.0269		27.1	2.25	-42.80 to 47.30	No	ns	>0.9999
	44.2	41.5	36.3	38.813	3.67696	2.6	48.3	33.5	40.225	10.4652	7.4		Residual				35.7	0.2	-44.85 to 45.25	No	ns	>0.9999
	52.9	89.7	62.8	75.0544	19.0212	13.45	107.1	162.2	131.801	38.9616	27.55						44.2	-2	-47.05 to 43.05	No	ns	>0.9999
	61.4	83.6	44.5	60.9934	27.6479	19.55	111.9	154.8	131.614	30.3349	21.45						52.9	-48.4	-93.45 to -3.346	Yes	*	0.0313
	70	78.1	40.3	56.102	26.7286	18.9	109.1	152.4	128.945	30.6177	21.65						61.4	-54.3	-99.35 to -9.246	Yes	*	0.0138
	78.6	26	14	19.0788	8.48528	6	45.9	17.5	28.3417	20.0818	14.2						70	-51.55	-96.60 to -6.496	Yes	*	0.0202
	87.2	23.8	12.7	17.3856	7.84889	5.55	49.8	17.7	29.6894	22.6981	16.05						78.6	-11.7	-56.75 to 33.35	No	ns	0.9967
	95.7	23.1	11.9	16.5798	7.9196	5.6	52.4	16.3	29.2253	25.5266	18.05						87.2	-15.5	-60.55 to 29.55	No	ns	0.9683
																	95.7	-16.85	-61.90 to 28.20	No	ns	0.9438
Panel B											ANOVA summary				Tukey's multiple comparisons test	Mean Diff.	95.00% CI of diff.	Significant?	Summary	Adjusted P Value
Basal Respiration	R1	R2	MEAN	SD	SE						F	9.337			Glucose D5 vs. Oleate D5	-240.5	-538.0 to 57.03	No	ns	0.0959
DAY 5 GLUCOSE	72.4	178.9	113.808	75.3069	53.25						P value	0.028			Glucose D5 vs. Glucose D6	95.8	-201.7 to 393.3	No	ns	0.6029
DAY 6 GLUCOSE	12.3	47.4	24.1458	24.8194	17.55						P value summary	*			Glucose D5 vs. Oleate D6	92.15	-205.4 to 389.7	No	ns	0.6276
DAY 5 OLEATE	448	284.3	356.884	115.753	81.85						Significant diff. among means (P < 0.05)?	Yes			Oleate D5 vs. Glucose D6	336.3	38.77 to 633.8	Yes	*	0.0334
DAY 6 OLEATE	4.5	62.5	16.7705	41.0122	29						R square	0.875			Oleate D5 vs. Oleate D6	332.7	35.12 to 630.2	Yes	*	0.0347
											F (DFn, DFd)	F (3, 4) = 9.337			Glucose D6 vs. Oleate D6	-3.65	-301.2 to 293.9	No	ns	>0.9999
Panel C
Spare Respiratory Capacity	R1	R2	MEAN	SD	SE						ANOVA summary				Tukey's multiple comparisons test	Mean Diff.	95.00% CI of diff.	Significant?	Summary	Adjusted P Value
DAY 5 GLUCOSE	112.7	81.1	95.6032	22.3446	15.8						F	8.915			Glucose D5 vs. Oleate D5	-43.4	-110.0 to 23.21	No	ns	0.172
DAY 6 GLUCOSE	67.4	45.4	139.891	15.1321	10.7						P value	0.0303			Glucose D5 vs. Glucose D6	40.5	-26.11 to 107.1	No	ns	0.2036
DAY 5 OLEATE	151	129.6	55.3169	15.5563	11						P value summary	*			Glucose D5 vs. Oleate D6	-9.9	-76.51 to 56.71	No	ns	0.9254
DAY 6 OLEATE	113.9	99.7	106.564	10.0409	7.1						Significant diff. among means (P < 0.05)?	Yes			Oleate D5 vs. Glucose D6	83.9	17.29 to 150.5	Yes	*	0.0231
											R square	0.8699			Oleate D5 vs. Oleate D6	33.5	-33.11 to 100.1	No	ns	0.3076
											F (DFn, DFd)	F (3, 4) = 8.915			Glucose D6 vs. Oleate D6	-50.4	-117.0 to 16.21	No	ns	0.1157
Panel E
Stage III/IV Melanosomes	CELL1	CELL2	CELL3	CELL3	CELL5	CELL6	CELL7	CELL8	Mean	SD	SE		ANOVA summary		Dunnett's multiple comparisons test	Mean Diff.	95.00% CI of diff.	Significant?	Summary
D0	3	2	1	2	3	1	1	0	1.66851	0.899735	0.318105		F	19.6	D0 vs. D4	-1.375	-4.712 to 1.962	No	ns
D4	3	3	1	6	4	2	4	1	2.53918	1.69031	0.597614		P value	<0.0001	D0 vs. D5	-5.625	-8.962 to -2.288	Yes	***
D5	6	10	8	7	7	7	3	10	6.86605	2.25198	0.796196		P value summary	****	D0 vs. D6	-9.25	-12.59 to -5.913	Yes	****
D6	10	13	10	7	20	11	11	5	10.1211	4.45413	1.57477		Significant diff. among means (P < 0.05)?	Yes
													R square	0.6774
													F (DFn, DFd)	F (3, 28) = 19.60
Panel F
% of Unhealthy Mitochondria	CELL1	CELL2	CELL3	CELL3	CELL5	CELL6	CELL7	CELL8	Mean	SD	SE		ANOVA summary		Dunnett's multiple comparisons test	Mean Diff.	95.00% CI of diff.	Significant?	Summary
D0	10.3448	22.2222	18.1818	5.26316	6.06061	8.69565	7.69231	6.66667	9.83775	6.47046	2.28765		F	47.08	D0 vs. D4	2.034	-4.750 to 8.818	No	ns
D4	7.14286	6.45161	7.69231	12.5	5.26316	12	13.0435	4.7619	8.03551	3.24156	1.14606		P value	<0.0001	D0 vs. D5	-7.527	-14.31 to -0.7423	Yes	*
D5	22.2222	7.69231	19.0476	18.1818	18.1818	21.4286	26.087	12.5	17.1607	5.7112	2.01922		P value summary	****	D0 vs. D6	-27.03	-33.82 to -20.25	Yes	****
D6	33.3333	42.8571	40	46.6667	34.1463	38.8889	38.2353	27.2727	37.232	4.66798	1.65038		Significant diff. among means (P < 0.05)?	Yes
													R square	0.8346
													F (DFn, DFd)	F (3, 28) = 47.08

## Sheet: Figure 5
Figure 5 Data Quantitation
Panel B										ANOVA summary
SREBF1 N-terminal	R1	R2	R3	R4	Mean	SD	SE			F	12.71			Tukey's multiple comparisons test	Mean Diff.	95.00% CI of diff.	Significant?	Summary
D4	1	1	1	1	1	0	0			P value	0.0024			D4 vs. D5	0.3636	0.03604 to 0.6913	Yes	*
D5	0.61217	0.559413	0.585422	0.788416	0.585272	0.0263794	0.0152301			P value summary	**			D4 vs. D6	0.5859	0.2583 to 0.9135	Yes	**
D6	0.669324	0.196536	0.118947	0.621532	0.250117	0.297899	0.171992			Significant diff. among means (P < 0.05)?	Yes			D5 vs. D6	0.2223	-0.1053 to 0.5499	No	ns
										R square	0.7385
										F (DFn, DFd)	F (2, 9) = 12.71
Panel E
CONTROL	1HR			2HR			3HR			4HR
	R1	R2	R3	R1	R2	R3	R1	R2	R3	R1	R2	R3		Fixed effect (type III)	P value	P value summary	Statistically significant (P < 0.05)?	F (DFn, DFd)
Cell1	45	20	27	52.3333	13.6667	18.3333	29.6667	14.6667	21	27.3333	36.3333	17.6667		Treatment (between columns)	0.4175	ns	No	F (2.512, 99.63) = 0.9264
Cell2	39.3333	14	18.3333	37.3333	8.66667	15.3333	39.3333	22.3333	21.3333	7	22	10.3333
Cell3	53.3333	18.3333	13.3333	55	4.33333	10.6667	58.3333	34.3333	12.3333	55.6667	14	12.3333		Dunnett's multiple comparisons test	Mean Diff.	95.00% CI of diff.	Significant?	Summary	Adjusted P Value
Cell4	37	26	16	51	9.66667	13.6667	43.6667	7.66667	6	30.3333	18.6667	11.3333		1 hours vs. 2 hours	-0.2751	-2.419 to 1.869	No	ns	0.9792
Cell5	32.3333	9.33333	25.3333	30.6667	18	31	12.6667	24	16.3333	19.3333	17.6667	27.3333		1 hours vs. 3 hours	-1.996	-5.469 to 1.477	No	ns	0.3706
Cell6	17	8.66667	31.6667	31	17	30.6667	33.6667	8	31.3333	19.6667		33		1 hours vs. 4 hours	-0.8726	-4.582 to 2.837	No	ns	0.892
Cell7	21	4	6	18.6667	2.33333	11	14.6667	3	17.6667	18	12.3333	22.3333
Cell8	26	10.3333	16	50.3333	29	11.6667	49.3333	14.3333	13	50.6667	18.3333	12
Cell9	24.6667	6.33333	12.3333	31	8.66667	6.33333	26	8.66667	10	37.6667	9.66667	5.5
Cell10	13.6667	2.66667	24.3333	15.3333	9.66667	24.6667	6.66667	6	20.6667	26.6667	6.33333	18.6667
Cell11	17	11.3333	8.33333	28	9.33333	19.3333	24	4.66667	23.3333		2.66667	20.3333
Cell12	47.3333	9.33333	25.3333	54.6667	21.3333	19.6667	22.6667	31.6667	17	22	20.6667	16.6667
Cell13		27.6667	62		22	46.6667		20	44.6667		21.6667	13.3333
Cell14		9	29.3333		6.66667	23		10.6667	28.6667		5.33333	27.3333
Cell15		3.66667	23.6667		14	17.6667		10.3333	15.6667		7	18.6667
Cell16		7.66667	16		3	19.6667		11.6667	19.3333		8.66667	13.3333
Cell17		18	52		5	42.6667		7.33333	50.3333		3	65.6667
Cell18		5.33333	38		2.66667	44		59.6667	42.3333		19.3333	41.3333
Cell19		20	11.6667		30	13		51	13		16.3333	18.3333
Cell20		7.66667	45.3333		7.33333	35		7.66667	30.6667		0	45
Cell21		15.3333	7		12.3333	8.66667		6	11		1	8
Cell22		2.66667	26.3333		6	29.3333		3	41.6667		6	47.3333
Cell23		6.66667	37.6667		13.6667	27.3333		17.3333	37.3333		32	37.3333
Cell24		8	34		8	30.3333		12.3333	39		10	25.6667
Cell25		5	25.3333		18.3333	25.6667		17.3333	27.6667		12.6667	36
Cell26		2	9.33333		2	18.3333		4	13.3333		4.66667	18.3333
Cell27		5.33333	35.3333		10.6667	32.3333		7	40		11.3333	38
Cell28		5	48.6667		5.66667	41.3333		10.3333	50		2.66667	49
Cell29		7	17		11	14.6667		34.3333	20		29.6667	16.6667
Cell30		14.3333	15.6667		19.3333	14.3333		15.6667	9.33333		39	9.33333
Cell31		5.33333			7			2			2.33333
Cell32		6			8			3.33333			11.6667
Cell33		22			9.33333			9			2.66667
Cell34		4			10.3333			19.6667			34.3333
Cell35		19.6667			25.6667			47			9
Cell36		20.6667			18			13.3333			13
Cell37		1.33333			5			2			1.33333
Cell38		2			8			5.33333			14.3333
Cell39		4.33333			1.33333			1.33333			2.66667
Cell40		8			9.66667			8			9.66667
Cell41		17.3333			4			10
MSH	1HR			2HR			3HR			4HR
	R1	R2	R3	R1	R2	R3	R1	R2	R3	R1	R2	R3		Fixed effect (type III)	P value	P value summary	Statistically significant (P < 0.05)?	F (DFn, DFd)
Cell1	23.3333	3.33333	20	29.3333		25	29.3333	1.33333	36.3333		1.33333	22.6667		Treatment (between columns)	<0.0001	****	Yes	F (2.668, 69.36) = 15.14
Cell2	23	2.33333	39.6667	26	8.66667	42	30	4.33333	44.6667	49	5.33333	55.3333
Cell3	22.6667	4.33333	24.6667	28	4.33333	23	41.6667	3	22		4.66667	23
Cell4	40.3333	3.66667	53	33.6667	11.3333	60	34.6667	9.33333	50	38	10	69.3333
Cell5	15.3333	3	55	19.3333	5.66667	54.6667	13.6667	27	62	34.6667	10.3333	62
Cell6	23.3333	6.66667	31.6667	22.6667	33.6667	38	42	22	43		15	38
Cell7	16.6667	11.6667	19	30.6667	26	23.3333	50	14.6667	24.6667	32.6667	0	29.3333		Dunnett's multiple comparisons test	Mean Diff.	95.00% CI of diff.	Significant?	Summary	Adjusted P Value
Cell8	13.3333	16.3333	46.6667	11.6667	26	41.3333	19.6667	7.66667	54	36.6667	5	53.3333		1 hours vs. 2 hours	-4.039	-6.457 to -1.621	Yes	***	0.0009
Cell9	18.6667		17.6667	20.6667		19.6667	22.3333		24.3333	25.6667		26		1 hours vs. 3 hours	-7.683	-11.09 to -4.280	Yes	****	<0.0001
Cell10	62		15.6667	59.6667		21	69.3333		20.6667	66		14		1 hours vs. 4 hours	-7.46	-10.89 to -4.030	Yes	****	<0.0001
Cell11	38.3333		24.6667	52		23.3333	50.3333		21	64.6667		21.3333
Cell12	33.3333		6.33333	48.3333		16.3333			20.3333	34.3333		26.5
Cell13	42.3333		36	45.6667		30.6667	53.6667		29.3333			46
Cell14	23		46	24.3333		51.3333	33.6667		54.6667	43		55.3333
Cell15	39.3333		11	40.3333		14	63.3333		21	37.3333		21.3333
Cell16			40.3333			49.3333			67.3333			56.3333
Cell17			12.3333			16.3333			13			21.3333
Cell18			32.3333			39			37			37.6667
Cell19			28			19.3333			24			20.5
Cell20			13			14			18			17
Cell21			9.66667			13			33			20.5
Panel F
% of cell showing positive phenotype	R1	R2	R3	Mean	SD	SE			Unpaired t test
Control	13	23	29	20.5442	8.0829	4.66667			P value	0.013
MSH	56	76	50	59.7022	13.6137	7.85988			P value summary	*
									Significantly different (P < 0.05)?	Yes
									One- or two-tailed P value?	Two-tailed
									t, df	t=4.267, df=4

## Sheet: Figure 6
Figure 6 Data Quantitation
											Unpaired t test DMSO vs 25HC
Panel C											P value	0.0001
TYR	R1	R2	R3	R4	Mean	SD	SE				P value summary	***
DMSO	1	1	1	1	1	0	0				Significantly different (P < 0.05)?	Yes
25-HC	0.3	0.40447	0.592296	0.50785	0.43709	0.126705	0.0633525				One- or two-tailed P value?	Two-tailed
											t, df	t=8.663, df=6
Panel D
	siNT			siSrebf1							ANOVA summary
	R1	R2	R3	R1	R2	R2	Mean	SD	SE		F	61.03
Srebf1	0	0	0	-0.381071	-0.419702	-0.43839	-0.38959	0.0292318	0.016877		P value	<0.0001		Tukey's multiple comparisons test	Mean Diff.	95.00% CI of diff.	Significant?	Summary
Fasn	0	0	0	-0.362251	-0.467912	-0.442044	-0.42702	0.0550761	0.0317982		P value summary	****		NT vs. SREBF1	0.4131	0.2986 to 0.5275	Yes	****
Tyrp1	0	0	0	-0.340044	-0.257564	-0.219943	-0.27251	0.0614312	0.0354673		Significant diff. among means (P < 0.05)?	Yes		NT vs. FASN	0.4241	0.3096 to 0.5385	Yes	****
											R square	0.9581		NT vs. TYRP1	0.2725	0.1581 to 0.3870	Yes	***
											F (DFn, DFd)	F (3, 8) = 61.03
Panel H
TYR	R1	R2	R3	Mean	SD	SE					ANOVA summary
CONTROL	1	1	1	1	0	0					F	37.61		Dunnett's multiple comparisons test	Mean Diff.	95.00% CI of diff.	Significant?	Summary	Adjusted P Value
PTU	0.677942	0.600936	0.693487	0.656175	0.0495602	0.0286136					P value	0.0004		CONTROL vs. PTU	0.3425	0.2288 to 0.4563	Yes	***	0.0003
25HC	0.859735	0.803325	0.72399	0.793712	0.0681944	0.039372					P value summary	***		CONTROL vs. 25 HC	0.2043	0.09054 to 0.3181	Yes	**	0.0038
											Significant diff. among means (P < 0.05)?	Yes
											R square	0.9261
											F (DFn, DFd)	F (2, 6) = 37.61
Panel J
	siNT 48 hrs			siSrebf1 48 hrs			Mean	SD	SE		SREBF1 siNT vs siSrebf1			FASN siNT vs siSrebf1			TYRP1 siNT vs siSrebf1
	R1	R2	R3	R1	R2	R3					Unpaired t test			Unpaired t test			Unpaired t test
SREBF1	1	1	1	0.346102	0.22284	0.22414	0.258566	0.0707931	0.0408724		P value	<0.0001		P value	0.0006		P value	<0.0001
FASN	1		1	0.81453		0.82341	0.818958	0.00627911	0.00444		P value summary	****		P value summary	***		P value summary	****
TYRP1	1	1	1	0.820768	0.788191	0.815043	0.807875	0.0173928	0.0100418		Significantly different (P < 0.05)?	Yes		Significantly different (P < 0.05)?	Yes		Significantly different (P < 0.05)?	Yes
											One- or two-tailed P value?	Two-tailed		One- or two-tailed P value?	Two-tailed		One- or two-tailed P value?	Two-tailed
											t, df	t=18.00, df=4		t, df	t=40.77, df=2		t, df	t=19.12, df=4

## Sheet: Figure 7
Figure 7 Data Quantitation
Panel C
Melanin content	R1	R2	R3	Mean	SD	SE									ANOVA summary
DMSO	100	100	100	100	0	0									F	43.12			Dunnett's multiple comparisons test	Mean Diff.	95.00% CI of diff.	Significant?	Summary
ORLISTAT	38.8889	38	48.42	41.5156	5.77651	3.33507									P value	<0.0001			DMSO vs. ORLISTAT	58.23	42.21 to 74.25	Yes	****
T863	62.2222	53.6	72.92	62.4193	9.67856	5.58792									P value summary	****			DMSO vs. T863	37.09	21.07 to 53.10	Yes	***
C75	43.8889	46.4	58.22	49.1264	7.65287	4.41839									Significant diff. among means (P < 0.05)?	Yes			DMSO vs. C75	50.5	34.48 to 66.51	Yes	****
															R square	0.9418
															F (DFn, DFd)	F (3, 8) = 43.12
Panel E
TYR	R1	R2	R3	Mean	SD	SE									ANOVA summary
DMSO	1	1	1	1	0	0									F	8.438			Dunnett's multiple comparisons test	Mean Diff.	95.00% CI of diff.	Significant?	Summary
ORLISTAT	0.58925	0.511114	0.554952	0.550839	0.0391648	0.0226118									P value	0.0074			DMS0 vs. Orlistat	0.4482	0.1153 to 0.7811	Yes	*
T863	0.221662	0.504571	0.759743	0.439636	0.269159	0.155399									P value summary	**			DMS0 vs. C75	0.5047	0.1718 to 0.8376	Yes	**
C75	0.875244	0.87468	0.738499	0.82688	0.0787874	0.0454879									Significant diff. among means (P < 0.05)?	Yes			DMS0 vs. T863	0.1705	-0.1624 to 0.5034	No	ns
															R square	0.7599
															F (DFn, DFd)	F (3, 8) = 8.438
Panel H
Mean pixel intesity	D0			D21															Sidak's multiple comparisons test	Mean Diff.	95.00% CI of diff.	Significant?	Summary	Adjusted P Value
Fold change	R1	R2	R3	R1	R2	R3	Mean	SD	SE						ANOVA table	F (DFn, DFd)	P value		D0 - D21
Control	1	1	1	1.05351	1.2097	1.21357	1.15645	0.0913152	0.0527209						Interaction	F (3, 8) = 1.206	P=0.3679		Control	-0.1589	-0.3799 to 0.06209	No	ns	0.1882
Control+Orlistat	1	1	1	1.08104	1.34499	1.12624	1.17868	0.141163	0.0815005						Row Factor	F (3, 8) = 1.206	P=0.3679		Control+Orlistat	-0.1841	-0.4051 to 0.03693	No	ns	0.1104
UV+Orlistat	1	1	1	1.14466	1.33811	1.16592	1.21324	0.106089	0.0612507						Column Factor	F (1, 8) = 41.36	P=0.0002		UV+Orlistat	-0.2162	-0.4372 to 0.004791	No	ns	0.0554
UV	1	1	1	1.17744	1.39138	1.42434	1.32637	0.134047	0.0773921						Subject	F (8, 8) = 1.000	P=0.5000		UV	-0.3311	-0.5521 to -0.1100	Yes	**	0.0055
Panel I
DAY7	Non-UV CONTROL						Non-UV ORLISTAT								ANOVA summary				Tukey's multiple comparisons test	Mean Diff.	95.00% CI of diff.	Significant?	Summary
Relative mRNA expression	R1	R2	R3	Mean	SD	SE	R1	R2	R3	Mean	SD	SE			F	36.64			UV Control MITF vs. UV Orlistat MITF	0.6553	0.3397 to 0.9708	Yes	***
Mitf	1	1	1	1	0	0	1	1	1	1	0	0			P value	<0.0001			UV Control tyr vs. UV orlistat tyr	0.7205	0.4049 to 1.036	Yes	***
Tyr	1	1	1	1	0	0	1	1	1	1	0	0			P value summary	****
DAY7	UV CONTROL						UV ORLISTAT								Significant diff. among means (P < 0.05)?	Yes
	R1	R2	R3	Mean	SD	SE	R1	R2	R3	Mean	SD	SE			R square	0.9322
Mitf	1.70138	1.51758	1.53714	1.58327	0.100944	0.05828	1.09262	0.986067	0.711632	0.915258	0.196561	0.113485			F (DFn, DFd)	F (3, 8) = 36.64
Tyr	1.83417	1.91963	1.83149	1.86132	0.0501307	0.028943	1.14312	1.22356	1.0572	1.13927	0.0831946	0.0480324
Panel J
DAY7	Non-UV CONTROL						Non-UV ORLISTAT								ANOVA summary				Tukey's multiple comparisons test	Mean Diff.	95.00% CI of diff.	Significant?	Summary
Relative mRNA expression	R1	R2	R3	Mean	SD	SE	R1	R2	R3	Mean	SD	SE			F	12.87			UV control mitf vs. UV orlistat mitf	0.8438	0.3814 to 1.306	Yes	**
Mitf	1	1	1	1	0	0	1	1	1	1	0	0			P value	0.002			UV control tyr vs. UV orlistat tyr	0.2964	-0.1660 to 0.7588	No	ns
Tyr	1	1	1	1	0	0	1	1	1	1	0	0			P value summary	**
DAY 30	UV CONTROL						UV ORLISTAT								Significant diff. among means (P < 0.05)?	Yes
	R1	R2	R3	Mean	SD	SE	R1	R2	R3	Mean	SD	SE			R square	0.8283
Mitf	1.72012	1.85119	1.67837	1.74837	0.0901697	0.0520595	0.910274	1.08879	0.719271	0.893313	0.184797	0.106692			F (DFn, DFd)	F (3, 8) = 12.87
Tyr	1.64736	1.19196	1.44007	1.41409	0.228004	0.131638	1.23749	1.22535	0.927473	1.12038	0.175587	0.101375
