# Supplementary material for: Temporal analysis of melanogenesis identifies fatty acid metabolism as key skin pigment regulator
Source: PLoS Biol. 2022 May 18;20(5):e3001634. doi: 10.1371/journal.pbio.3001634 (PMC9116682; doi:10.1371/journal.pbio.3001634)
Supplement: S4 Data — (XLSX) [file pbio.3001634.s013.xlsx]

## Sheet: Fig 3A MS data_FC
Time Course analysis FC
Sample	Sample Codes	1,4 Diaminobutane	Betaine aldehyde	Choline	Dimethylglycine	Amino isobutyrate	Beta hydroxybutyrate	Creatinine	2-oxo-3-methyl butyrate	Betaine	Valine	Indole	Methylhydroxybutyrate	Cysteine	Nicotinamine	Thymine	Mesaconic acid	Itaconic acid	Pipecolic acid	Mevalanolactone	Leucine	Creatine	Ornithine	Asparagine	Carbamoyl beta alanine	Aspartate	Homocysteine	Methylcysteine	Adenine	Methylnicotinamide	Hypoxanthine	Isobutyryl glycine	Lysine	Glutamine	Glutamate	Acetyl serine	Methionine	Hydroxy anthranilate	Amino octanoic acid	Carnitine	Methionine sulfoxide	Pyridoxine	Methyl histidine	Arginine	Acetyl ornithine	Citrulline	Carbamoyl aspartate	Tyrosine	Phosphorylcholine
Day3 Rep1	IGC1	0.299262	0.98657	0.565562	0.660854	0.707459	1.18972	0.442869	0.597118	0.934383	0.561191	1.28408	0.786982	0.791015	0.214967	0.678381	0.982951	1.00585	1.02306	1.41972	0.542823	0.54735	1.40599	0.425792	2.57057	0.862952	0.0718248	0.345038	0.509527	0.659565	0.170396	1.24031	1.13901	0.311745	0.867445	0.865904	0.923075	0.666518	0.663083	1.2741	0.91887	0.690822	0.72742	0.776266	0.833921	0.418506	0.841616	0.359281	0.707113
Day3 Rep2	IGC2	1.22754	0.780682	1.04261	1.03733	1.14656	1.17575	0.978134	0.333698	1.30182	1.01307	0.815207	1.05165	0.806431	0.869693	0.966224	1.001	0.992514	1.04877	0.851201	0.995555	0.980634	0.965945	0.783937	0.944522	1.07611	0.951045	1.09945	1.09761	1.01006	0.654649	0.897463	1.03662	1.12258	1.04677	1.05815	1.12776	1.3073	1.04038	1.0504	1.03831	0.94358	1.02185	1.14142	1.14545	0.869435	1.13178	1.14455	1.06373
Day3 Rep3	IGC3	0.958889	1.11487	1.27613	1.2162	1.08584	0.0917776	1.32725	0.315392	1.09419	1.22068	0.91875	1.15037	1.27612	1.56809	1.17318	1.03693	1.01537	0.887516	0.743019	1.22192	1.23594	1.05551	1.28543	0.162701	0.982893	2.01219	1.55045	1.30494	1.15337	1.33003	0.856432	0.850905	1.54765	1.02209	0.999285	0.517045	0.778812	1.10251	0.782658	1.04415	1.182	1.11827	1.05572	1.01426	1.62712	1.04299	1.50845	1.13735
Day3 Rep4	IGC4	1.51431	1.11788	1.1157	1.08561	1.06015	1.54275	1.25175	2.75379	0.669614	1.20506	0.981962	1.01099	1.12644	1.34725	1.18222	0.979113	0.986269	1.04065	0.986058	1.2397	1.23608	0.57256	1.50484	0.322208	1.07805	0.964941	1.00506	1.08791	1.17701	1.84493	1.0058	0.973464	1.01803	1.06369	1.07666	1.43212	1.24737	1.19403	0.892838	0.998668	1.1836	1.13246	1.02659	1.00637	1.08493	0.983616	0.987716	1.0918
Day4 Rep1	IGC5	2.96561	1.85168	2.91849	2.84561	2.02149	3.08508	1.21397	6.79031	1.59328	1.69395	0.657249	0.839556	0.0980577	1.27318	1.65078	0.656677	0.644214	2.03105	1.82411	1.64301	1.62973	0.454279	1.75536	3.06655	1.43652	2.93195	2.69232	0.854224	1.69074	0.371042	1.42607	1.84198	2.88032	1.45558	1.68879	4.44409	1.87558	2.36637	5.35461	1.80082	3.53544	4.0679	1.19217	1.18446	0.733369	0.563381	2.70169	1.45526
Day4 Rep2	IGC6	2.74794	1.96432	2.98031	2.96987	2.42068	2.90587	1.35769	7.74032	1.19252	1.77924	0.716032	1.45969	0.18123	1.5382	1.67132	0.699543	0.685925	1.9472	1.89953	1.67294	1.73929	0.615746	2.04219	3.37619	1.44572	4.42793	2.86302	0.925459	1.78029	0.441215	1.69165	1.71403	3.08006	1.41697	1.67402	2.9256	1.66323	2.22585	4.2985	2.00715	3.90872	4.79705	1.43625	1.4057	0.914393	0.635168	2.82295	1.50354
Day4 Rep3	IGC7	2.69521	1.76779	2.78903	2.86959	2.59811	2.78014	1.20106	5.18078	1.44185	1.61595	0.457533	1.49238	0.0496827	1.75527	1.52044	0.750498	0.761388	1.92066	1.96554	1.62659	1.61712	0.483706	1.96148	3.32433	1.3947	3.95389	2.67284	0.839584	1.64463	0.50637	1.7474	1.77636	2.8407	1.35981	1.58975	1.94813	2.18415	2.0704	4.28601	1.87513	3.5898	4.25956	1.23967	1.33557	0.851758	0.822257	2.57381	1.40378
Day4 Rep4	IGC8	2.99506	1.88655	2.99888	3.05515	2.55017	3.11277	1.29814	6.945	1.79589	1.69843	0.663165	0.714301	0.0914066	1.96864	1.50678	0.727871	0.719318	1.84892	2.06792	1.68368	1.6547	0.507385	2.32466	3.84845	1.42442	3.19312	2.82365	0.951263	1.71311	0.589798	1.61425	1.65801	2.84925	1.3818	1.63695	0.851149	2.62293	2.26134	3.81912	1.74298	3.71399	4.42047	1.45516	1.43325	1.21183	0.681007	2.68812	1.41978
Day5 Rep1	IGC9	4.32344	1.91152	2.12629	2.04868	1.70115	2.4767	1.79716	10.0919	1.17167	2.10416	0.237247	0.891796	0.268447	1.75279	1.76152	0.695039	0.694456	1.72735	2.26043	1.85606	1.90158	0.516855	2.65298	2.88704	1.22128	3.82243	3.20116	0.899695	2.0076	0.588979	1.40842	1.44058	3.4827	1.33964	1.53476	2.01075	1.45479	3.00961	3.58617	1.28097	4.16996	5.09439	1.49417	1.44096	0.863772	0.51062	3.08619	1.67708
Day5 Rep2	IGC10	3.37312	1.83219	2.08613	2.13294	1.6791	2.60628	1.60203	11.1827	0.631307	2.01074	0.237986	1.81315	0.163862	1.35461	1.73929	0.627165	0.563876	1.83191	2.18263	1.82578	1.86283	0.559391	2.87908	2.44445	1.26582	5.10384	3.58306	0.825154	1.9751	0.501328	1.56701	1.56065	3.79726	1.33176	1.522	1.04989	1.49696	3.07147	4.19509	1.2991	4.32324	5.7764	1.36592	1.41746	0.900583	0.871743	3.27005	1.64998
Day5 Rep3	IGC11	3.81274	1.4968	2.21457	2.17096	1.74357	5.76545	1.70232	15.8541	1.57438	2.23358	0.246311	1.42049	0.363541	1.83641	1.85982	0.684763	0.57075	1.7357	1.68698	1.98029	2.01082	0.55189	3.13921	2.88338	1.26744	3.45834	3.58333	0.908822	2.08685	0.660843	1.43552	1.46149	3.91981	1.36615	1.60109	1.14487	1.47211	3.16276	3.93377	1.27771	4.32649	5.45263	1.55296	1.50478	0.942735	1.01862	3.48437	1.80732
Day5 Rep4	IGC12	4.3143	1.59353	2.07131	2.16111	1.81403	1.78755	1.48266	18.773	1.14829	1.97234	0.504152	2.12751	0.246051	1.93823	1.79615	0.703942	0.707192	1.69565	2.10816	1.9296	1.9108	0.564459	2.93015	3.02773	1.22916	3.58991	3.29744	0.853921	2.03202	0.590816	1.45222	1.43107	3.58943	1.34582	1.5825	1.66854	1.38746	2.87959	3.71347	1.33661	4.25313	5.01507	1.42502	1.47844	0.869733	0.880593	3.28532	1.62308
Day5 Rep5	IGC13	4.35306	1.40629	2.08425	1.92235	1.25498	1.86099	1.24169	20.7999	0.685819	2.03028	0.24303	1.48456	0.147554	1.78223	1.72932	0.690949	0.686801	1.69283	2.276	1.856	1.90333	0.458885	2.73257	2.98501	1.20655	3.41872	3.05779	0.831728	1.96273	0.668994	1.49188	1.41028	3.38571	1.368	1.6131	3.40288	1.6191	2.8834	3.93555	1.28772	4.29903	5.07494	1.36789	1.42743	0.910531	0.820188	3.01999	1.65076
Day6 Rep1	IGC14	5.1633	1.7891	1.5399	1.44986	0.76786	2.62929	3.39183	5.82345	1.93447	2.6675	0.460725	0.918292	0.162799	4.14179	1.5583	0.534813	0.491778	1.63991	1.94627	2.18813	2.25567	0.477475	4.06443	3.82114	1.07322	5.82202	4.63294	0.991124	2.71067	1.00278	1.73839	1.43884	5.02394	1.14826	1.25806	1.70142	1.87315	4.72915	4.57647	1.71489	5.6032	7.52288	1.44725	1.46097	1.1357	0.809871	4.56847	1.76466
Day6 Rep2	IGC15	3.61587	1.58865	1.3614	1.32071	1.226	4.37104	2.30942	12.9805	1.60591	2.51713	0.0529812	1.98674	0.143922	2.85523	1.47299	0.552544	0.557053	1.57556	2.11902	2.08224	2.14455	0.481855	4.074	4.12384	1.06619	4.88383	4.11223	0.789436	2.70183	0.864767	1.75233	1.35846	4.62773	1.18256	1.28257	2.73146	2.03931	4.54862	4.45554	1.7284	5.60783	6.35857	1.37597	1.40449	1.77066	0.719092	4.10803	1.6695
Day6 Rep3	IGC16	5.15653	1.29036	1.72829	1.90921	1.78217	5.40871	11.1054	4.16644	1.18124	2.71079	0.230794	0.857374	0.13228	12.275	1.53024	0.781141	0.746816	1.16444	1.39196	2.36623	2.38389	0.562379	4.76682	0.450004	0.979248	5.98185	4.66607	0.74087	2.93533	1.6056	1.71239	1.01127	5.08548	0.995193	1.05778	2.46247	1.42086	4.29549	2.26618	1.34382	5.39304	6.34944	1.65446	1.66264	2.00458	0.787049	4.46565	1.66733
Day6 Rep4	IGC17	4.34567	1.58001	1.49485	1.30664	1.34431	0.481044	2.42503	7.7987	0.779036	2.63026	0.147015	0.981397	0.16603	2.86768	1.38838	0.61362	0.545926	1.58572	0.84622	2.09041	2.23553	0.37834	4.16529	3.76889	1.0823	5.79404	4.2795	0.910873	2.66899	0.866505	2.15277	1.38048	4.58939	1.16421	1.25655	1.26248	1.71563	4.41305	4.41202	1.62855	5.28293	6.50023	1.29169	1.25159	1.84583	0.586812	4.23268	1.64067
Day6 Rep5	IGC18	5.13711	1.83957	1.36886	1.36644	1.2517	2.97616	2.24805	12.2269	1.53581	2.54378	0.782462	1.47381	0.261971	2.07087	1.4504	0.56046	0.5066	1.58625	2.38116	2.03721	2.07092	0.41896	3.54262	3.65629	1.04779	4.35028	3.83767	0.782501	2.59768	0.72407	2.51271	1.37299	4.01627	1.18177	1.30143	1.13983	1.89337	4.40722	5.05992	1.75108	5.2476	6.65542	1.32223	1.32382	0.739238	0.862973	3.84225	1.62279
[truncated: 127 more columns]
